# Supplementary material
Source: PubMed Central journal article supplement (PMC3113345)
Supplement: mmc1.pdf [file mmc1.pdf]

**Supplemental Data**

**American Journal of Human Genetics, Volume 88**

**Mutations in *ZBTB24* Are Associated  
with Immunodeficiency, Centromeric Instability,  
and Facial Anomalies Syndrome Type 2**

**Jessica C. de Greef, Jun Wang, Judit Balog, Johan T. den Dunnen, Rune R. Frants,  
Kirsten R. Straasheijm, Caner Aytakin, Mirjam van der Burg, Laurence Duprez, Alina  
Ferster, Andrew R. Gennery, Giorgio Gimelli, Ismail Reisli, Catharina Schuetz, Ansgar  
Schulz, Dominique F.C.M. Smeets, Yves Sznajer, Cisca Wijmenga, Marja C. van  
Eggermond, Monique M. van Ostaijen-ten Dam, Arjan C. Lankester, Maarten J.D. van  
Tol, Peter J. van den Elsen, Corry M. Weemaes, and Silvère M. van der Maarel**

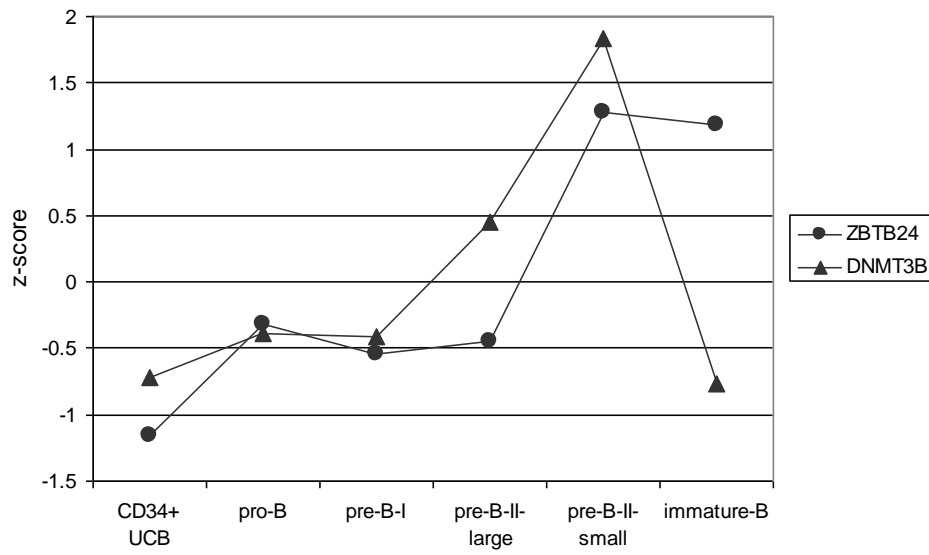

**Figure S1. Expression Pattern of *ZBTB24* and *DNMT3B* during Bone Marrow Precursor B-Cell Differentiation**

Expression levels were determined by gene expression profiling using Affymetrix HG-U133 set GeneChip arrays.<sup>1</sup> The expression values of the probe sets are normalized to zero mean and unit standard deviation (z-score).

**A**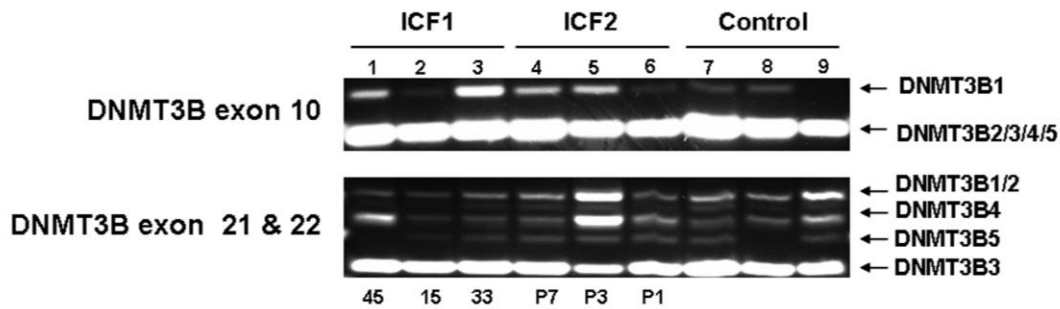**B**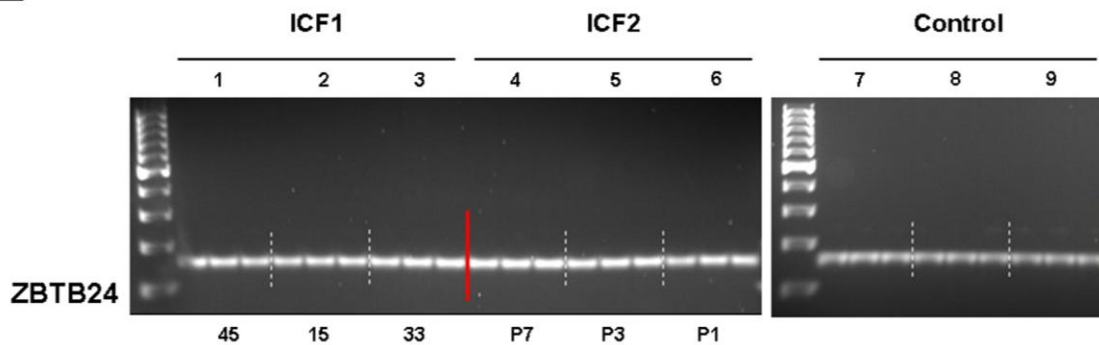

**Figure S2. Expression of *DNMT3B* Splice Variants and *ZBTB24* in ICF1 and ICF2 Patients and Control Individuals**

RNA was isolated from EBV-immortalized B cells (samples 2-4 and 6-9), fibroblasts (sample 1) and leukocytes (sample 5). Samples 1, 2 and 3 were described before in a large study as patients 45, 15 and 33, respectively.<sup>2</sup> Sample 4 is P7, sample 5 is P3 and sample 6 is P1.

(A) Expression of five major *DNMT3B* splice variants. RT-PCR was performed with primer pairs recognizing exon 10 or exons 21 and 22. *DNMT3B1* is the full-length RNA product. The *DNMT3B2* transcript lacks exon 10. The *DNMT3B3* transcript lacks exons 10, 21 and 22. The *DNMT3B4* transcript lacks exons 10 and 21. Finally, the *DNMT3B5* transcript lacks exons 10 and 22.<sup>3,4</sup>

(B) *ZBTB24* expression (experiment performed in triplicate). RT-PCR was performed with a primer pair recognizing the full-length RNA transcript.

**Table S1. Primer Sequences for *ZBTB24* Mutation Analysis**

| <b>Primer name</b> | <b>Primer sequence</b>       | <b><i>ZBTB24</i> exon</b> |
|--------------------|------------------------------|---------------------------|
| Exon 2.1_forward   | 5'-GGGCTGGCATTAAACCTTTTA-3'  | exon 2 (ATG)              |
| Exon 2.1_reverse   | 5'-TTCTTCCTCTGCAGCCAGTT-3'   | exon 2 (ATG)              |
| Exon 2.2_forward   | 5'-GTGCCCCAGTGGTTGTTATC-3'   | exon 2                    |
| Exon 2.2_reverse   | 5'-ACAATGCCCATCACACAGAA-3'   | exon 2                    |
| Exon 3_forward     | 5'-TCATTGTTGGCCTTTTGGAT-3'   | exon 3                    |
| Exon 3_reverse     | 5'-CAATGACACCACGTTGGAAA-3'   | exon 3                    |
| Exon 4_forward     | 5'-GTAGAAAATGGGGACCTGGA-3'   | exon 4                    |
| Exon 4_reverse     | 5'-ATGGTGGCGGACAATAACAT-3'   | exon 4                    |
| Exon 5_forward     | 5'-TCAGGGAAGTGCTTTAACACAA-3' | exon 5                    |
| Exon 5_reverse     | 5'-TTCCAAACACAGGCTTAGCA-3'   | exon 5                    |
| Exon 6_forward     | 5'-TTGTGAAACCGAAGTGTTTTT-3'  | exon 6                    |
| Exon 6_reverse     | 5'-TGCACACAAAATTCTGCAAAG-3'  | exon 6                    |
| Exon 7_forward     | 5'-TCTTGATTGCTTCCCCCTAA-3'   | exon 7 (TGA)              |
| Exon 7_reverse     | 5'-GAGCCTGATTTCAAGCGTTC-3'   | exon 7 (TGA)              |

**Table S2. Clinical Characteristics of ICF2 Patients with *ZBTB24* Mutations Compared with the Clinical Characteristics of ≤20 ICF1**

**Patients with *DNMT3B* Mutations**

|                                  | <b>P1</b>                                                                                  | <b>P2</b>                                               | <b>P3</b>                   | <b>P5</b>                                   | <b>P6</b>                   | <b>P7</b>                  | <b>P10</b>               | <b>ICF1 (n≤20)</b>                                                                                           |
|----------------------------------|--------------------------------------------------------------------------------------------|---------------------------------------------------------|-----------------------------|---------------------------------------------|-----------------------------|----------------------------|--------------------------|--------------------------------------------------------------------------------------------------------------|
| <b>ZBTB24_allele 1</b>           | p.Asn306IlefsX4<br>(c.917delA)                                                             | p.Ser16X<br>(c.47C>G)                                   | p.Arg320X<br>(c.958C>T)     | p.Val168SerfsX28<br>(c.501dup)              | p.Ser278X<br>(c.833C>G)     | p.Ser278X<br>(c.833C>G)    | p.Arg457X<br>(c.1369C>T) | x                                                                                                            |
| <b>ZBTB24_allele 2</b>           | p.Asn306IlefsX4<br>(c.917delA)                                                             | p.Ser16X<br>(c.47C>G)                                   | p.Arg320X<br>(c.958C>T)     | p.Val168SerfsX28<br>(c.501dup)              | p.Cys408Gly<br>(c.1222T>G)  | p.Cys408Gly<br>(c.1222T>G) | p.Arg457X<br>(c.1369C>T) | x                                                                                                            |
| <b>Sex</b>                       | M                                                                                          | F                                                       | F                           | M                                           | M                           | F                          | M                        | x                                                                                                            |
| <b>Birth year</b>                | 2006                                                                                       | 1987                                                    | 1983                        | 1997                                        | 1998                        | 2001                       | 1981                     | x                                                                                                            |
| <b>Age at death (years)</b>      | -                                                                                          | 13                                                      | 11                          | -                                           | 4                           | -                          | -                        | x                                                                                                            |
| <b>Origin</b>                    | Turkish                                                                                    | Scottish                                                | Turkish                     | Turkish                                     | German                      | German                     | Italian                  | x                                                                                                            |
| <b>Birth weight (grams)</b>      | NA                                                                                         | 1300                                                    | NA                          | 2340                                        | NA                          | 2270                       | 2950                     | <2950: 6/17                                                                                                  |
| <b>Motor development delay</b>   | yes                                                                                        | yes                                                     | yes                         | NA                                          | NA                          | yes                        | no                       | 10/17                                                                                                        |
| <b>Mental retardation</b>        | yes                                                                                        | yes                                                     | yes                         | yes                                         | yes                         | yes                        | yes                      | 9/20                                                                                                         |
| <b>Facial anomalies</b>          | yes                                                                                        | yes                                                     | yes                         | yes                                         | yes                         | yes                        | yes                      | 18/18                                                                                                        |
| <b>Gastrointestinal problems</b> | diarrhea                                                                                   | -                                                       | reflux                      | diarrhea                                    | -                           | -                          | -                        | diarrhea: 7/16,<br>malabsorption: 2/16                                                                       |
| <b>Infections</b>                | Arthritis,<br>bronchopneumonia,<br>Candida,<br>gastroenteritis,<br>meningitidis,<br>otitis | Bronchopneumonia,<br>Candida,<br>Pneumocystis jirovecii | Bronchopneumonia,<br>sepsis | Bronchopneumonia,<br>Pneumocystis jirovecii | Bronchopneumonia,<br>otitis | Bronchopneumonia           | Bronchopneumonia         | Bronchopneumonia: 8/18,<br>Candida: 2/18,<br>otitis: 2/18,<br>Pneumocystis jirovecii: 2/18,<br>sepsis: 2/18, |

|                                      |                     |                    |                    |                     |                    |                     |                   |                              |
|--------------------------------------|---------------------|--------------------|--------------------|---------------------|--------------------|---------------------|-------------------|------------------------------|
| <b>IgG (g/L)</b>                     | 1.15 (2.0-6.7)      | 1.50 (4.1-11.0)    | <2.00 (4.1-11.0)   | 1.50 (4.0-11.0)     | <2.00 (4.1-11.0)   | 3.00 (4.0-11.0)     | 3.80 (7.0-16.0)   | Hypogammaglobulinemia: 19/20 |
| <b>IgA (g/L)</b>                     | <0.06 (0.08-0.7)    | 0.07 (0.1-1.6)     | 0.00 (0.1-1.6)     | 0.07 (0.1-1.6)      | 2.89 (0.1-1.6)     | 0.81 (0.1-1.6)      | 0.20 (0.7-4.0)    | IgA deficiency: 1/20         |
| <b>IgM (g/L)</b>                     | <0.04 (0.3-1.0)     | 0.22 (0.5-1.8)     | 0.00 (0.5-1.8)     | <0.02 (0.5-1.8)     | 0.03 (0.5-1.8)     | 0.23 (0.5-1.8)      | 1.24 (0.4-2.3)    | IgM deficiency: 0/20         |
| <b>CD3 T-cells (counts/μl)</b>       | 5060<br>(2400-6900) | 1440<br>(900-4500) | 1140<br>(900-4500) | 4070<br>(1600-6700) | 2150<br>(900-4500) | 6200<br>(2400-6900) | 720<br>(800-3500) | Decreased: 0/12              |
| <b>CD4 T-cell subset (counts/μl)</b> | 4420<br>(1400-5100) | 860<br>(500-2400)  | 990<br>(500-2400)  | 2860<br>(1000-4600) | 1620<br>(500-2400) | 4530<br>(1400-5100) | 270<br>(400-2100) | Decreased: 0/12              |
| <b>CD8 T-cell subset (counts/μl)</b> | 630<br>(600-2200)   | 580<br>(300-1600)  | 240<br>(300-1600)  | 1210<br>(400-2100)  | 440<br>(300-1600)  | 1260<br>(600-2200)  | 500<br>(200-1200) | Decreased: 1/12              |
| <b>CD19 B-cells (counts/μl)</b>      | 1140<br>(700-2500)  | 770<br>(200-2100)  | 160<br>(200-2100)  | 990<br>(600-2700)   | 660<br>(200-2100)  | 1840<br>(700-2500)  | 50<br>(200-600)   | Decreased:4/8                |

NA: not analyzed. Between brackets: Ig reference values<sup>5</sup> and reference values lymphocyte (sub)populations.<sup>6</sup>

**Table S3. Primer Sequences for *DNMT3B* and *ZBTB24* RT-PCR Analysis**

| <b>Primer name</b>     | <b>Primer sequence</b>            |
|------------------------|-----------------------------------|
| ZBTB24_forward         | 5'-GCCGGATTTAACCCTTAGTG-3'        |
| ZBTB24_reverse         | 5'-GAGCCTGATTTCAAGCGTTC-3'        |
| DNMT3B ex10_forward    | 5'-AGCCCATGTTGGAGTGGGCCACG-3'     |
| DNMT3B ex10_reverse    | 5'-CATCCCCTCGGTCTTTGCCGTTGTTAT-3' |
| DNMT3B ex21/22_forward | 5'-CCTGCTGAATTACTCACGCCCC-3'      |
| DNMT3B ex21/22_reverse | 5'-GTCTGTGTAGTGCACAGGAAAGCC-3'    |
| GAPDH_forward          | 5'-GAGTCAACGGATTTGGTCGT-3'        |
| GAPDH_reverse          | 5'-TTGATTTTGGAGGGATCTCG-3'        |
| GUSB_forward           | 5'-CTCATTTGGAATTTTGCCGATT-3'      |
| GUSB_reverse           | 5'-CCGAGTGAAGATCCCCTTTTTA-3'      |
| ACTB_forward           | 5'-GGAGTCCTGTGGCATCCACG-3'        |
| ACTB_reverse           | 5'-CTAGAAGCATTGCGGTGGA-3'         |

### **Supplemental References**

- 1 van Zelm, M.C., van der Burg, M., de Ridder D., Barendregt, B.H., de Haas, E.F., Reinders, M.J., Lankester, A.C., Revesz, T., Staal, F.J., van Dongen, J.J. (2005). Ig gene rearrangement steps are initiated in early human precursor B cell subsets and correlate with specific transcription factor expression. *J. Immunol.* 175, 5912-22.
- 2 Hagleitner, M.M., Lankester, A., Maraschio, P., Hulten, M., Fryns, J.P., Schuetz, C., Gimelli, G., Davies, E.G., Gennery, A., Belohradsky, B.H., et al (2008). Clinical spectrum of immunodeficiency, centromeric instability and facial dysmorphism (ICF syndrome). *J. Med. Genet.* 45, 93-99.

- 3 Robertson, K.D., Uzvolgyi, E., Liang, G., Talmadge, C., Sumegi, J., Gonzales, F.A., Jones, P.A. (1999). The human DNA methyltransferases (DNMTs) 1, 3a and 3b: coordinate mRNA expression in normal tissues and overexpression in tumors. *Nucleic Acids Res.* 27, 2291-8.
- 4 Weisenberger, D.J., Velicescu, M., Cheng, J.C., Gonzales, F.A., Liang, G., Jones, P.A. (2004). Role of the DNA methyltransferase variant DNMT3b3 in DNA methylation. *Mol. Cancer Res.* 2, 62-72.
- 5 de Vries, E., Kuijpers, T.W., van Tol, M.J., van der Meer, J.W., Weemaes, C.M., van Dongen, J.J. (2000). Immunology in medical practice. XXXIV. Screening for suspected immunodeficiency: Introduction. *Ned. Tijdschr. Geneeskd.* 144, 2192-6.
- 6 Comans-Bitter, W.M., de Groot, R., van den Beemd, R., Neijens, H.J., Hop, W.C., Groeneveld, K., Hooijkaas, H., van Dongen, J.J. (1997). Immunophenotyping of blood lymphocytes in childhood. Reference values for lymphocyte subpopulations. *J. Pediatr.* 130, 388-93.
